# Supplementary figures and images for: p73 deficiency results in impaired self renewal and premature neuronal differentiation of mouse neural progenitors independently of p53
Source: PubMed Central journal article supplement — Cell Death Dis. 2010 Dec 16;1(12):e109–. doi: 10.1038/cddis.2010.87 (PMC3032295; doi:10.1038/cddis.2010.87), 2010-12-16

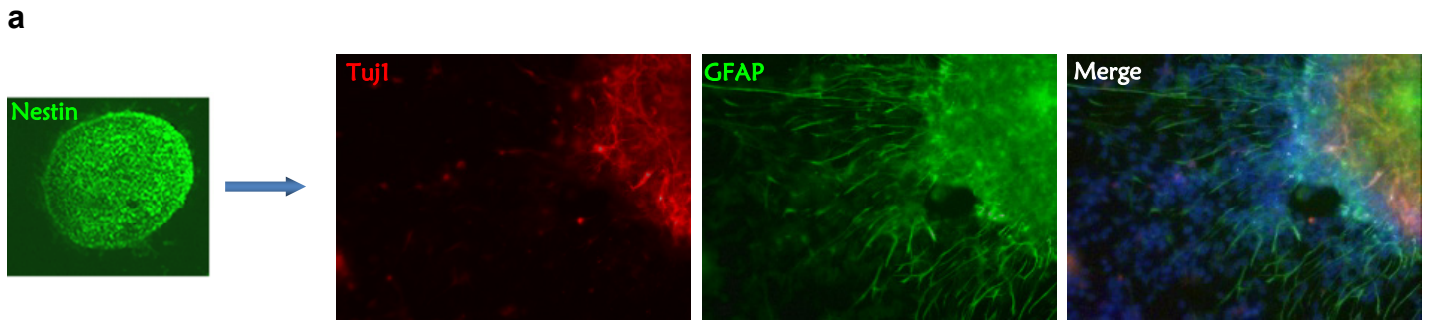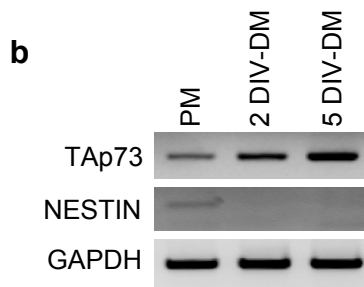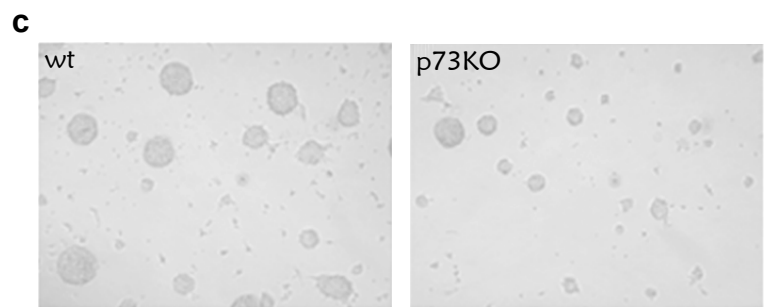

**SUPPLEMENTARY FIGURE 1**

Supplement: cddis201087x1.pdf [file cddis201087x1.pdf]

**a** **Tuj1** p73KO 3DIV-PM

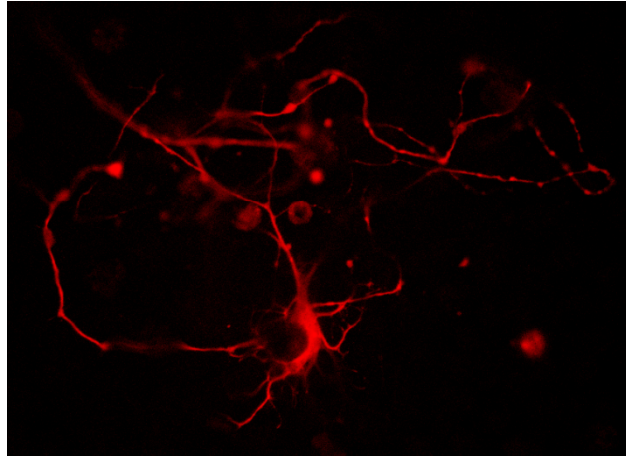

**SUPPLEMENTARY FIGURE 2**

Supplement: cddis201087x2.pdf [file cddis201087x2.pdf]

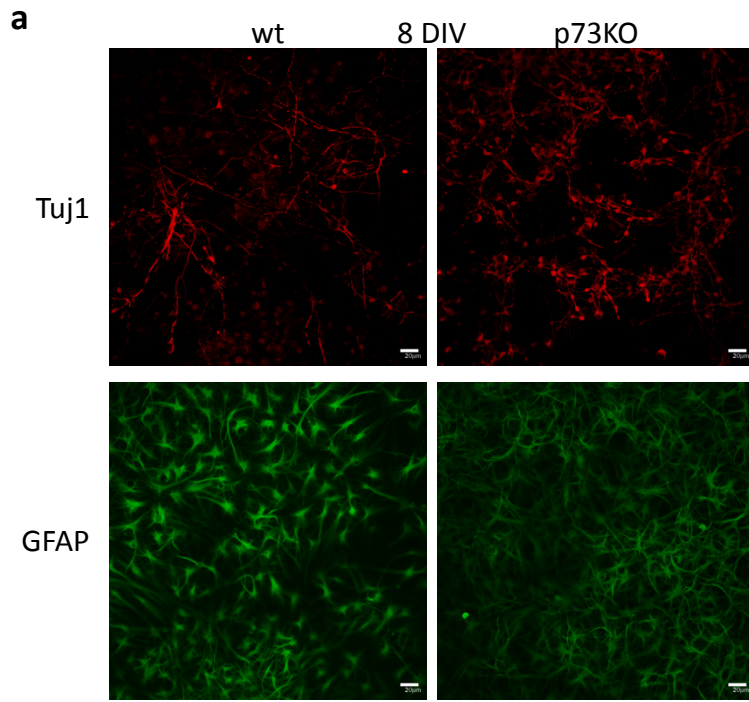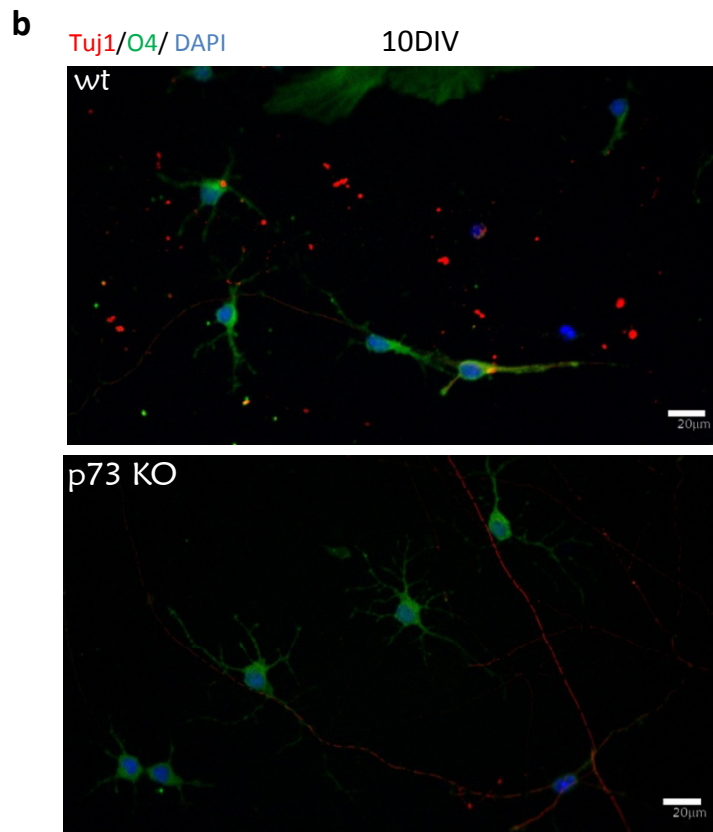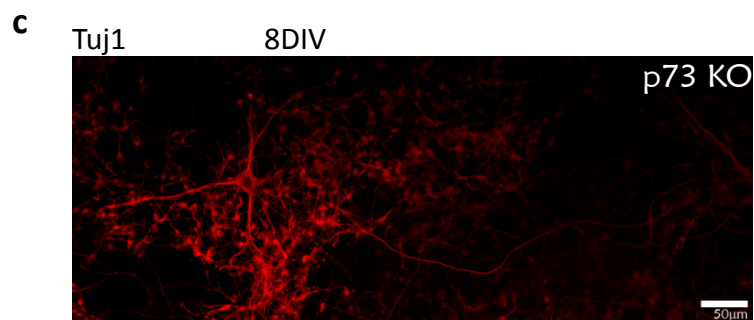

Supplement: cddis201087x3.pdf [file cddis201087x3.pdf]
